# Supplementary material for: A sacrificial separator facilitating in situ creation of a durable CEI layer and tailoring lithium dendrites for practical lithium metal batteries
Source: Royal Society of Chemistry journal article supplement (doi:10.1039/d4ta01234h), 2024-01-01
Supplement: d4ta01234h1.pdf [file d4ta01234h1.pdf]

## Supporting Information

### **Sacrificial separator facilitating in-situ creation of durable CEI layer and tailoring lithium dendrite for practical lithium metal batteries**

Sung Joon Park<sup>a‡</sup>, Yun Jeong Choi<sup>b‡</sup>, Jaemun Cheon<sup>c</sup>, Hyungjun Kim<sup>c</sup>, Jong-Won Lee<sup>d\*</sup>,  
Taeun Yim<sup>c\*</sup>, Ki Jae Kim<sup>a,c\*</sup>

<sup>a</sup>Department of Energy Science, Sungkyunkwan University, Suwon, Gyeonggi-do 16419,  
Republic of Korea

<sup>b</sup>Department of Energy Engineering, Konkuk University, Neungdong-ro 120, Gwangjin-gu,  
Seoul 05029, Republic of Korea

<sup>c</sup>Department of Chemistry, Incheon National University, 119 Academy-ro, Yeonsu-gu,  
Incheon 22012, Republic of Korea

<sup>d</sup>Division of Materials Science and Engineering, Hanyang University, 222 Wangsimni-  
ro, Seongdong-gu, Seoul 04763, Republic of Korea

<sup>e</sup>SKKU Institute of Energy Science and Technology (SIEST), Sungkyunkwan University,  
Suwon 16419, Republic of Korea

\*Corresponding authors: [jongwonlee@hanyang.ac.kr](mailto:jongwonlee@hanyang.ac.kr) (J.-W. Lee), [yte0102@inu.ac.kr](mailto:yte0102@inu.ac.kr) (T. Yim), [kijaekim@skku.edu](mailto:kijaekim@skku.edu) (K. J. Kim)

‡These authors contributed equally to this work

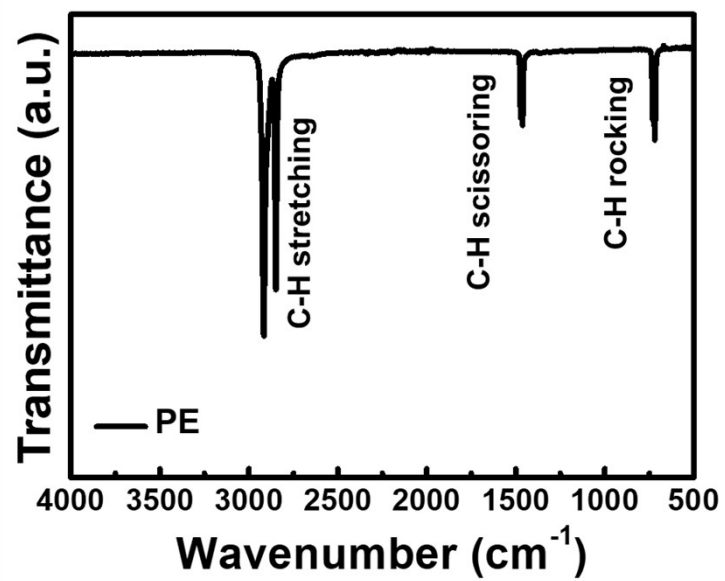

Fig. S1. FT-IR spectra of the PE separator

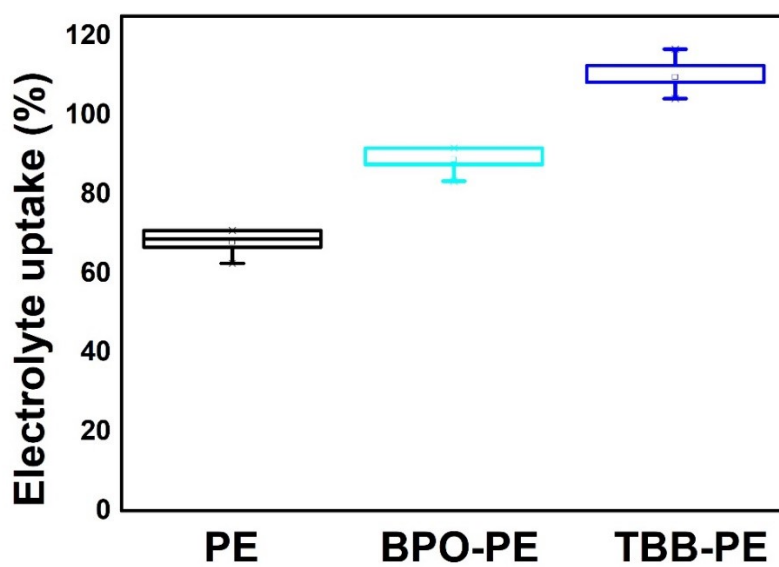

| Sample | Before | After  | Electrolyte uptake(%) |
|--------|--------|--------|-----------------------|
| PE     | 2.4 mg | 4.1 mg | 70.8                  |
| BPO-PE | 2.4 mg | 4.6 mg | 91.6                  |
| TBB-PE | 2.4 mg | 5.0 mg | 108.3                 |

**Fig. S2.** Electrolyte uptake results of PE, BPO-PE, and TBB-PE separator

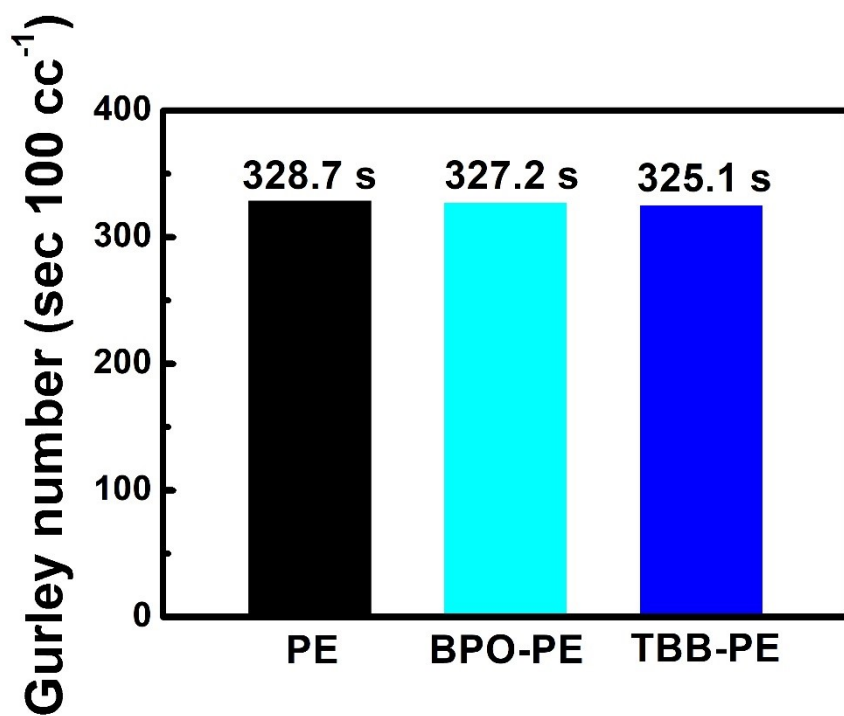

Fig. S3. Gurley number of PE, BPO-PE, TBB-PE separator

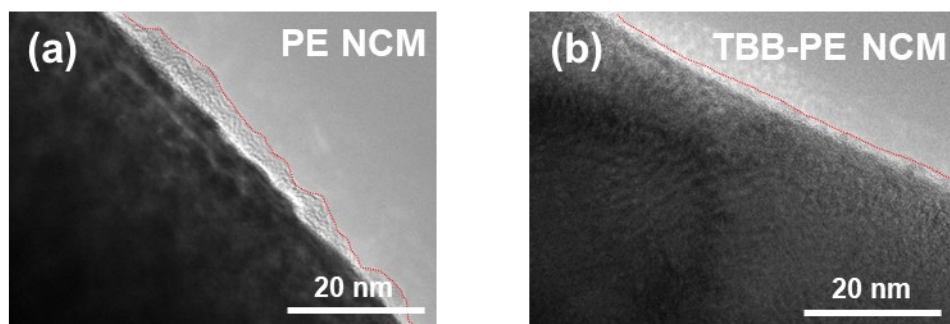

**Fig. S4.** TEM images of NCM particles after formation cycles with (a) PE and (b) TBB-PE separator

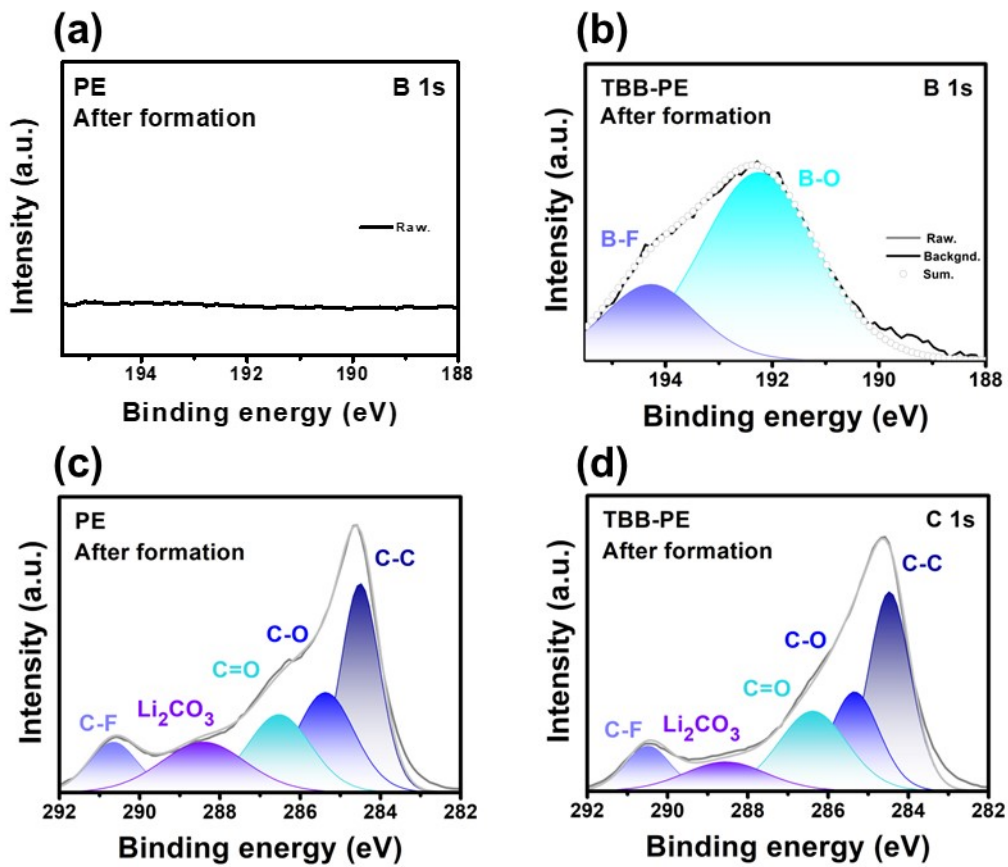

**Fig. S5.** XPS B 1s and C 1s spectra of NCM particles after formation cycles with (a, c) PE and (b, d) TBB-PE separator

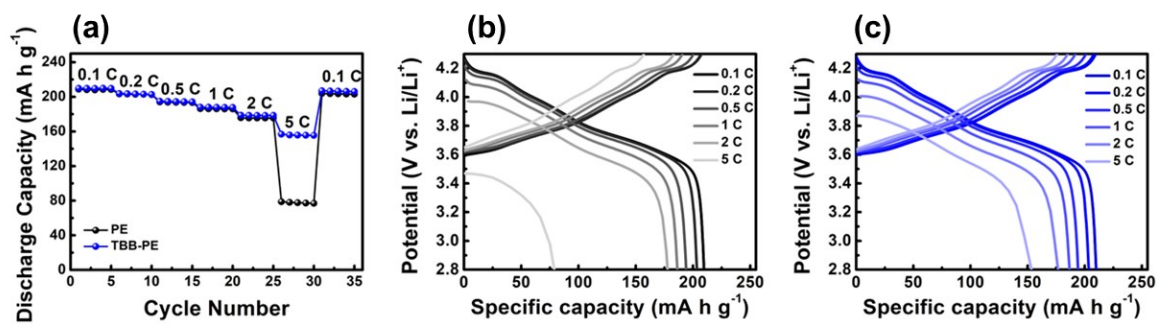

**Fig. S6.** (a) Rate performance of PE and TBB-PE separator. Charge/discharge voltage profiles of rate performance with (b) PE and (c) TBB-PE separator.

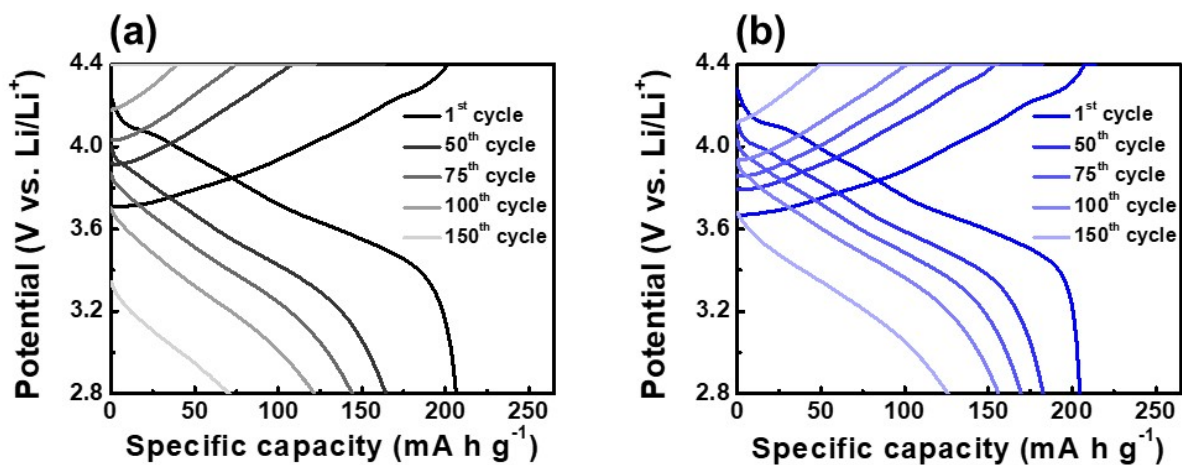

**Fig. S7.** Charge/discharge voltage profiles at elevated temperature and high cut-off voltage cycled with (a) PE and (b) TBB-PE separator.



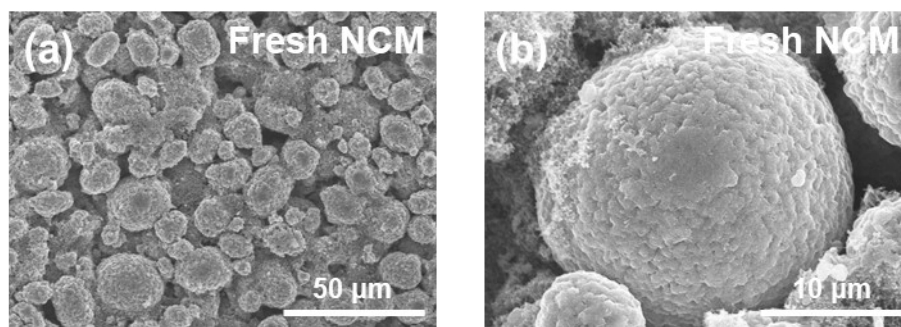

**Fig. S8.** (a-b) SEM images of NCM particles before cycling
